# Supplementary material for: Hypertension control in integrated HIV and chronic disease clinics in Uganda in the SEARCH study
Source: BMC Public Health. 2019 May 6;19:511. doi: 10.1186/s12889-019-6838-6 (PMC6501396; doi:10.1186/s12889-019-6838-6)
Supplement: Supplementary file 2 — Hypertension Drug Use Algorithm (PDF 172 kb) [file 12889_2019_6838_MOESM2_ESM.pdf]

# Hypertension Drug Use Algorithm

Initial medication regimen

**Bendroflumethiazide 5mg daily**

Follow-up in **4 weeks**

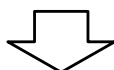

Target BP not achieved?

Increase

**Bendroflumethiazide 10mg**

Follow-up in **4 weeks**

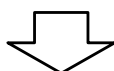

Target BP not achieved?

**Bendroflumethiazide 10 mg +  
Nifedipine 20 mg BID**

Follow-up in **4 weeks**

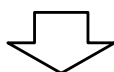

Target BP not achieved?

**Bendroflumethiazide 10 mg  
+ Nifedipine 20 mg BID +  
Add Captopril 25 mg BID**

Follow-up in **4 weeks**

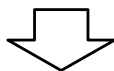

**Call ART Coordinator  
or  
Refer patient to the hospital**

## BP GOALS

Age <60 or TOD: SBP <140 and DBP <90

Age ≥60: SBP <150 and DBP <90

## **TARGET BP ACHIEVED?**

Prescribe same  
treatment and follow  
up every 3 months

## Measure BP & weight at each visit

### Medication Adherence:

**Always** check for drug adherence **at each visit**. Ask whether patient has **taken medication on each of the last three days**. Provide **counseling** if patient has **missed any dose** in the last three days.

### Lifestyle and Behavior

**Review life style and Behavior**. Provide Counseling if still present

### Medication Tolerability:

If patient is having **side effects**, change to another medication. Alternatively, call ART coordinator or refer patient to hospital

## Key

BID-Twice a day; SB -Systolic; DBP-Diastolic BP;  
TOD-target organ damage (Heart failure, kidney failure, stroke, myocardial infarction etc)

June 23, 2015
